# Supplementary material for: Bmapaf-1 is Involved in the Response against BmNPV Infection by the Mitochondrial Apoptosis Pathway
Source: MDPI journal article supplement (doi:10.3390/insects11090647), 2020-09-22
Supplement: s1 [file s1]

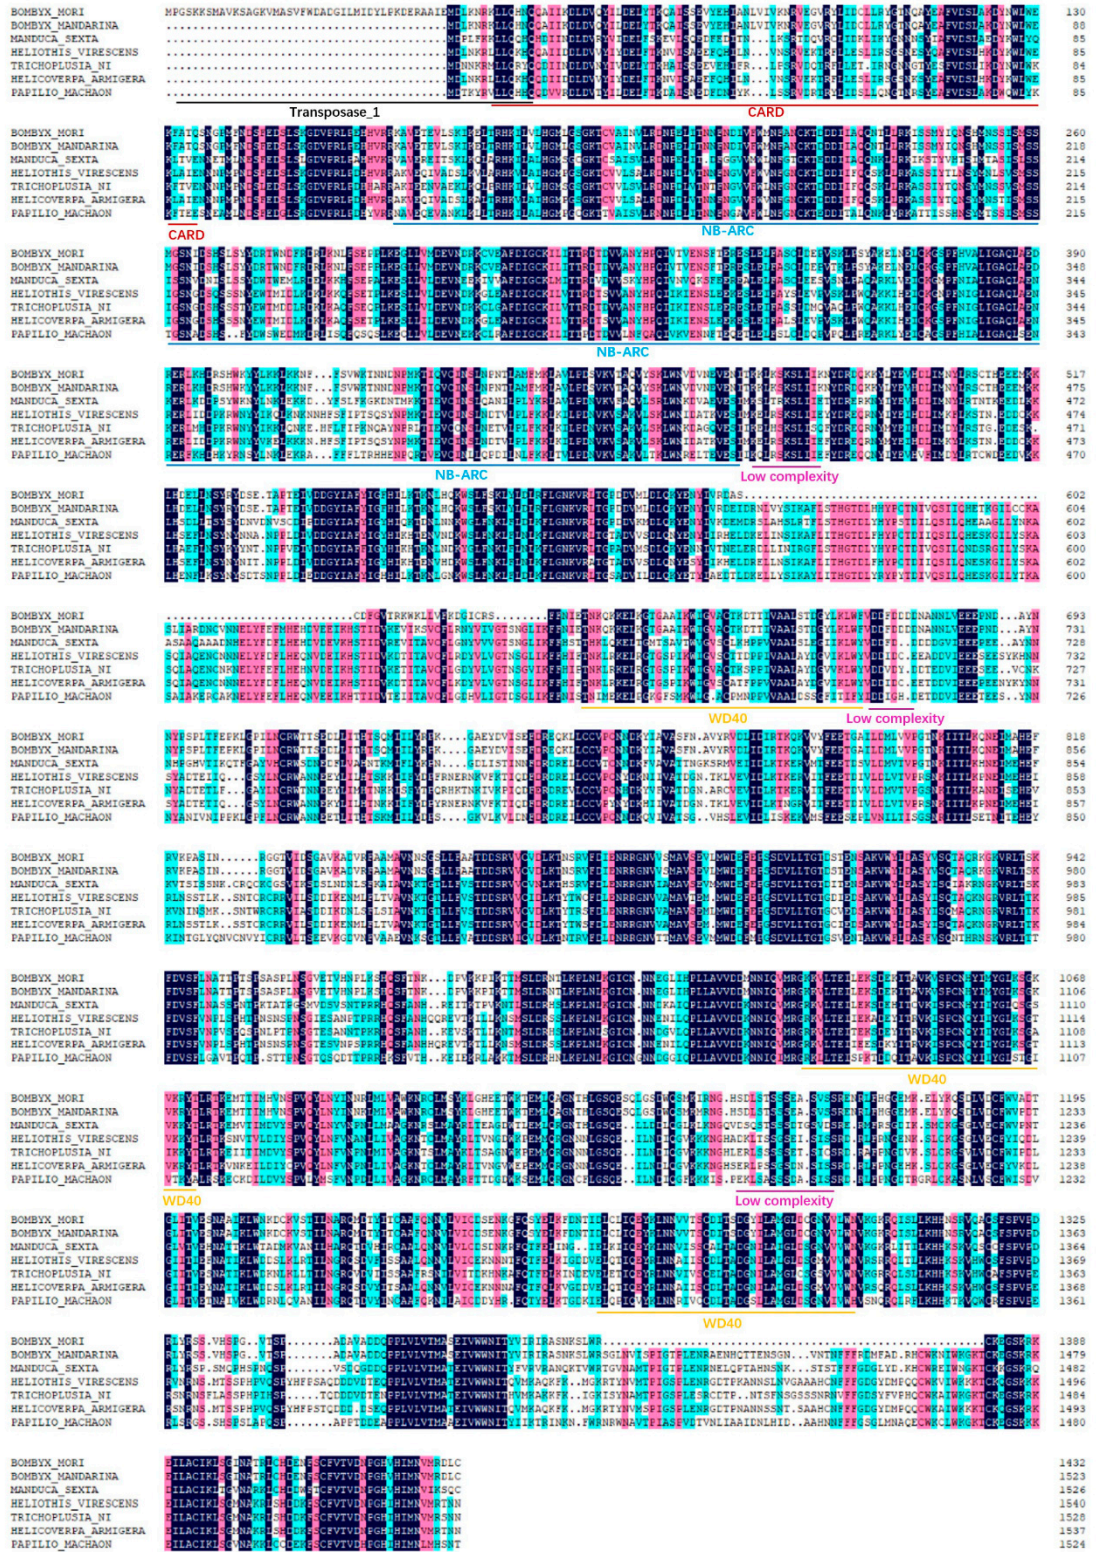

**Figure S1.** Multiple sequence alignment of BmApaf-1 amino acids with its homologous proteins of other species. The deduced amino acid sequence of BmApaf-1 and its homologs in other species were retrieved from the NCBI database. Identical amino acids are highlighted in dark blue, and the positive amino acids are highlighted in pink and aqua.

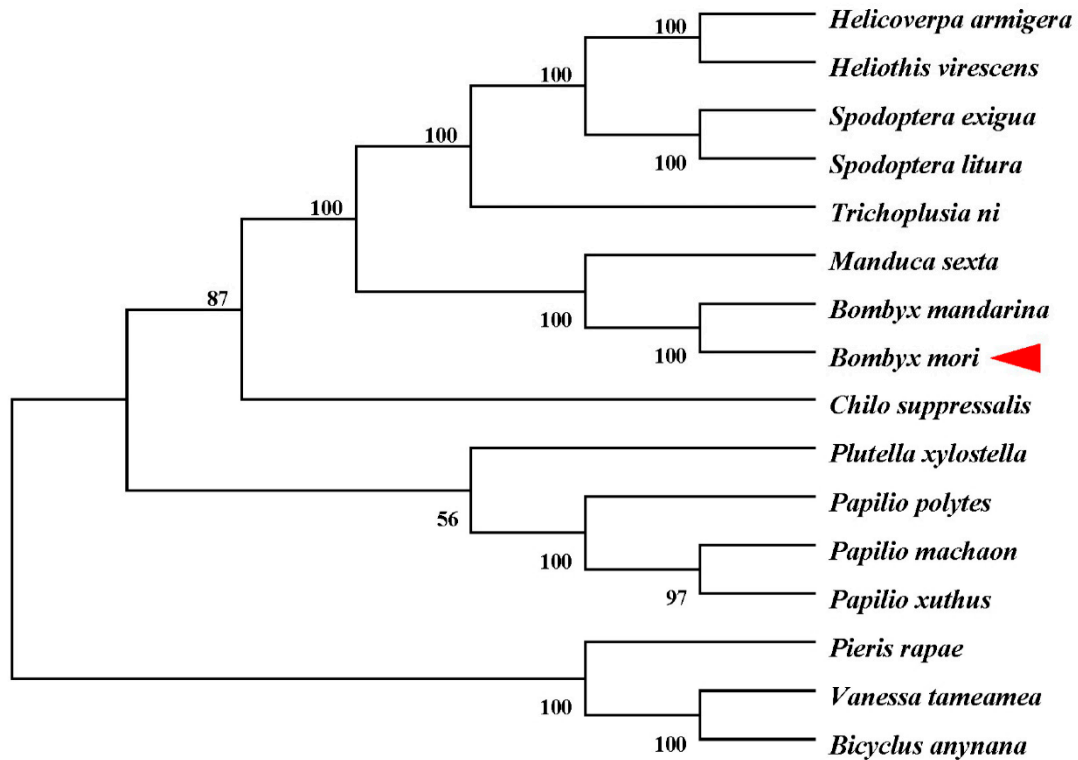

**Figure S2.** Phylogenetic analysis of BmApaf-1 using the neighbor-joining method. The tree was constructed with pairwise deletion of gaps in MEGA-X. The percentages on the branches indicate bootstrap values from 1000 replicates. The tree is drawn to scale, with branch lengths in the same units as those of the evolutionary distances used to infer the phylogenetic tree. The evolutionary distances were computed using the  $p$ -distance method. The analysis was included 16 amino acid sequences. All positions containing gaps and missing data were eliminated. Taxonomic names are shown on the right of the branches.

**Table S1.** The list of accession numbers of proteins using in phylogenetic analysis

| Species                      | Accession numbers |
|------------------------------|-------------------|
| <i>Bicyclus anynana</i>      | XP_023937388.1    |
| <i>Bombyx mandarina</i>      | XP_028036457.1    |
| <i>Bombyx mori</i>           | NP_001186937.1    |
| <i>Chilo suppressalis</i>    | RVE48846.1        |
| <i>Helicoverpa armigera</i>  | XP_021181657.1    |
| <i>Heliothis virescens</i>   | PCCG76501.1       |
| <i>Hyposmocoma kahamanoa</i> | XP_026319294.1    |
| <i>Manduca sexta</i>         | XP_030022507.1    |
| <i>Papilio Machaon</i>       | XP_014359375.1    |
| <i>Papilio polytes</i>       | XP_013138265.1    |
| <i>Papilio Xuthus</i>        | KPI94114.1        |
| <i>Pieris rapae</i>          | XP_022124006.1    |
| <i>Plutella xylostella</i>   | AHB86312.1        |
| <i>Spodoptera exigua</i>     | AYM00395.1        |
| <i>Spodoptera litura</i>     | XP_022828360.1    |

*Trichoplusia ni*

XP\_026734098.1

*Vanessa tameamea*

XP\_026496270.1

---
